# Supplementary material for: Heregulin Drives Endocrine Resistance by Altering IL-8 Expression in ER-Positive Breast Cancer
Source: MDPI journal article supplement (doi:10.3390/ijms21207737), 2020-10-19
Supplement: s1 [file s1]

*Brief Report*

**Heregulin overexpression drives endocrine resistance  
by altering IL-8 expression in ER-positive breast cancer**

SUPPLEMENTARY INFORMATION

|        |              |         |                |               |               |              |                |                 |              |       |                |          |         |
|--------|--------------|---------|----------------|---------------|---------------|--------------|----------------|-----------------|--------------|-------|----------------|----------|---------|
| C+     | C+           | C+      | C+             | Blank         | Acrp30        | AgRP         | Angiopoietin-2 | Amphiregulin    | Axl          | bFGF  | b-NGF          | BTC      | CCL-28  |
| C-     | C-           | C-      | C-             | Blank         | Acrp30        | AgRP         | Angiopoietin-2 | Amphiregulin    | Axl          | bFGF  | b-NGF          | BTC      | CCL-28  |
| CTACK  | Dtk          | EGFR    | ENA-78         | Fas/TNFR SF6  | FGF-4         | FGF-9        | GCSF           | GITR-Ligand     | GITR         | GRO   | GRO- $\alpha$  | HCC-4    | HGF     |
| CTACK  | Dtk          | EGFR    | ENA-78         | Fas/TNFR SF6  | FGF-4         | FGF-9        | GCSF           | GITR-Ligand     | GITR         | GRO   | GRO- $\alpha$  | HCC-4    | HGF     |
| ICAM-1 | ICAM-3       | IGFBP-3 | IGFBP-6        | IGF-1 SR      | IL-1 R4/ST2   | IL-1 RI      | IL-11          | IL-12 p40       | IL-12 p70    | IL-17 | IL-2R $\alpha$ | IL-6 R   | IL-8    |
| ICAM-1 | ICAM-3       | IGFBP-3 | IGFBP-6        | IGF-1 SR      | IL-1 R4/ST2   | IL-1 RI      | IL-11          | IL-12 p40       | IL-12 p70    | IL-17 | IL-2R $\alpha$ | IL-6 R   | IL-8    |
| I-TAC  | Lymphotactin | MIF     | MIP-1 $\alpha$ | MIP-1 $\beta$ | MIP-3 $\beta$ | MSP $\alpha$ | NT-4           | Osteoprotegerin | Oncostatin M | PIGF  | sgp130         | sTNF RII | sTNF RI |
| I-TAC  | Lymphotactin | MIF     | MIP-1 $\alpha$ | MIP-1 $\beta$ | MIP-3 $\beta$ | MSP $\alpha$ | NT-4           | Osteoprotegerin | Oncostatin M | PIGF  | sgp130         | sTNF RII | sTNF RI |
| TECK   | TIMP-1       | TIMP-2  | Thrombopoietin | TRAIL R3      | TRAIL R4      | uPAR         | VEGF           | VEGF-D          | Blank        | Blank | Blank          | Blank    | Blank   |
| TECK   | TIMP-1       | TIMP-2  | Thrombopoietin | TRAIL R3      | TRAIL R4      | uPAR         | VEGF           | VEGF-D          | Blank        | Blank | Blank          | C+       | C+      |

Figure S1. Cytokines map of the RayBio® Human Cytokine Antibody Array VII & 7.1
